1 Title: Longitudinal sequencing and variant detection of SARS-CoV-2 across Southern California  
2 wastewater from April 2020 – August 2021.

3

4 Jason A. Rothman<sup>a#</sup>, Andrew Saghir<sup>a</sup>, Amity G. Zimmer-Faust<sup>b</sup>, Kylie Langlois<sup>b</sup>, Joshua A.  
5 Steele<sup>b</sup>, John F. Griffith<sup>b</sup>, Katrine L. Whiteson<sup>a#</sup>

6

7 <sup>a</sup> Department of Molecular Biology and Biochemistry, University of California, Irvine, Irvine,  
8 CA, USA.

9 <sup>b</sup> Southern California Coastal Water Research Project, Costa Mesa, CA, USA

10

11 # Co-corresponding authors: Jason A. Rothman, University of California, Irvine, Irvine, CA,  
12 92697, (949) 824-3509, rothmanj@uci.edu. Katrine L. Whiteson, University of California,  
13 Irvine, Irvine, CA, 92697, (949) 824-9032, katrine@uci.edu.

14 Abstract:

15 Wastewater based epidemiology (WBE) is a useful method to detect pathogen prevalence  
16 and may serve to effectively monitor diseases at a broad scale. WBE has been used throughout  
17 the COVID-19 pandemic to track localized and population-level disease burden through the  
18 quantification of SARS-CoV-2 RNA present in wastewater. Aside from case load estimation,  
19 WBE is being used to assay viral genomic diversity and the emergence of potential SARS-CoV-  
20 2 variants.

21 Here, we present a study in which we sequenced RNA extracted from sewage influent  
22 samples obtained from eight wastewater treatment plants representing 16 million people in  
23 Southern California over April 2020 – August 2021. We sequenced SARS-CoV-2 with two  
24 methods: Illumina Respiratory Virus Enrichment and metatranscriptomic sequencing (N = 269),  
25 and QIAseq SARS-CoV-2 tiled amplicon sequencing (N = 95). We were able to classify SARS-  
26 CoV-2 reads into lineages and sublineages that approximated several named variants across a  
27 full year, and we identified a diversity of single nucleotide variants (SNVs) of which many are  
28 putatively novel SNVs, and SNVs of unknown potential function and prevalence. Through our  
29 retrospective study, we also show that several sublineages of SARS-CoV-2 were detected in  
30 wastewater up to several months before clinical detection, which may assist in the prediction of  
31 future Variants of Concern. Lastly, we show that sublineage diversity was similar between  
32 wastewater treatment plants across Southern California, and that diversity changed by sampling  
33 month indicating that WBE is effective across megaregions.

34 As the COVID-19 pandemic moves to new phases, and additional SARS-CoV-2 variants  
35 emerge, the ongoing monitoring of wastewater is important to understand local and population-  
36 level dynamics of the virus. Our study shows the potential of WBE to detect SARS-CoV-2

37 variants throughout Southern California’s wastewater and track the diversity of viral SNVs and  
38 strains in urban and suburban locations. These results will aid in our ability to monitor the  
39 evolutionary potential of SARS-CoV-2 and help understand circulating SNVs to further combat  
40 COVID-19.

41 Introduction:

42

43 The COVID-19 pandemic has had a profound impact on the human population, causing  
44 over 600 million cases of disease and more than 6 million human deaths worldwide (1). Caused  
45 by the emergence of the +ssRNA “severe acute respiratory syndrome coronavirus 2” (2),  
46 COVID-19 has caused public health to react and respond in novel ways to track the spread of  
47 disease (3–5). One of these unexpected responses has been through the use of Wastewater-based  
48 epidemiology (WBE) to monitor SARS-CoV-2 viral loads in wastewater throughout the COVID-  
49 19 pandemic (4, 6, 7). As part of a worldwide effort to combat COVID-19, a massive assemblage  
50 of epidemiologists has developed methods and analyses for the examination of SARS-CoV-2  
51 viral material in wastewater to track the spread and approximate cases of COVID-19 (4, 8–10).  
52 While direct sampling from patients is the most definitive method of COVID-19 diagnosis (11,  
53 12), it has been shown that clinical testing has probably undercounted the true number of cases  
54 (3, 13–15). This inaccuracy in case counts is likely due to a combination of supplies issues,  
55 inability or reluctance to be tested for COVID-19, asymptomatic disease, and unreported at-  
56 home-testing (3, 13, 14). As a partner to traditional public health responses, WBE has shown to  
57 be a valuable tool in predicting and assaying case counts across populations both small and large  
58 (4, 7, 16, 17). Though WBE has shown to be a vital component of the world’s fight against  
59 COVID-19, its major method of RT-qPCR on extracted RNA from wastewater samples is only  
60 able to quantify viral loads and cannot monitor the evolution of SARS-CoV-2 and the resulting  
61 viral variants.

62 The SARS-CoV-2 virus has mutated many times since its original genomic description,  
63 representing ongoing evolution as the COVID-19 pandemic progresses (18–21). The WHO and

64 PANGO Network monitor these mutations broadly classifying variants into Variants of Concern  
65 (i.e. Alpha, Beta, Gamma, Delta, Omicron), Variants of Interest (i.e. Epsilon, Zeta, Eta, Mu), or  
66 Variants under Monitoring, along with lineage designations based on phylogenetics (i.e. B.1.351,  
67 B.1.1.529) (20–23). In many cases, SARS-CoV-2 variants may possess mutations that confer  
68 phenotypic changes into the COVID-19 disease, such as increased transmissibility or antibody  
69 escape (18, 24). While these variants often contain numerous mutations, single nucleotide  
70 polymorphisms (SNPs) have been shown to occur across the SARS-CoV-2 genome, (known as  
71 Single Nucleotide Variants; SNVs) representing mutational events that often have unknown  
72 functional or evolutionary consequences (17, 25–28). Currently, direct sampling from COVID-  
73 positive patients is the gold standard for SARS-CoV-2 sequencing but remains limited by the  
74 logistics required to administer tests and only allows for the sequencing of virus from one patient  
75 at a time. Likewise, single-isolate patient sequencing likely misses rare SARS-CoV-2 variants  
76 (29), or those infecting non-human hosts, which may serve as undetected reservoirs for SNVs  
77 (30). By sequencing SARS-CoV-2 from wastewater, we can capture circulating variants/SNVs  
78 across wide areas, which provides a composite sample representing large populations and may  
79 detect SNVs before standard medical sampling (17, 25, 29, 31).

80       There are many challenges to sequencing SARS-CoV-2 from wastewater samples (32–  
81 34). As a matrix of industrial, agricultural, and human-borne wastes, wastewater often contains a  
82 variety of detergents and other compounds that serve as PCR inhibitors and likely degrade viral  
83 particles (29, 32, 35, 36). Similarly, SARS-CoV-2 is often at a low viral load, and the virus  
84 detected in wastewater is almost certainly fragmented, making sequencing difficult due to an  
85 inability to cover an entire genome in one assay (17, 37–39). Sequencing methods have been  
86 developed to address these challenges, such as viral enrichment, targeted amplification of viral

87 regions, and various RNA extraction protocols, but many of these methods are designed for  
88 clinical samples, so wastewater analyses remain technically difficult to accurately conduct (16,  
89 17, 40, 41). In order to increase our confidence in SARS-CoV-2 variant analyses, we used two  
90 sequencing library preparation methods on wastewater samples: The Illumina Respiratory Virus  
91 Oligonucleotide Panel, which enriches for respiratory virus nucleic acids before sequencing, and  
92 the QIAseq SARS-CoV-2 Primer Panel, which uses 200 PCR primer sets to amplify the entire  
93 SARS-CoV-2 genome.

94         Sequencing SARS-CoV-2 obtained from wastewater is a critical component to  
95 monitoring the ongoing COVID-19 pandemic (4). Here we present a study in which we used  
96 metatranscriptomic sequencing and two methods of library preparation (Illumina Respiratory  
97 Virus Oligonucleotide Panel or QIAseq SARS-CoV-2 Primer Panel) to identify SNVs, clades,  
98 and sublineages of SARS-CoV-2 on 317 influent wastewater samples. These samples were  
99 obtained from eight WTPs across Southern California from April 2020 – August 2021 and  
100 represent the collective wastewater of approximately 16 million residents. We investigated  
101 several lines of inquiry through our study: First, what RNA viruses are represented in our  
102 samples? Second, what clades and sublineages of SARS-CoV-2 were present in Southern  
103 California’s wastewater, and can we detect variants of concern in wastewater? Third, what SNVs  
104 were present in Southern California wastewater, and can we detect these variants with both  
105 library preparation methods? Lastly, does wastewater sequencing allow for early detection of  
106 variants before clinical sequencing?

107 Materials and Methods:

108

109 *Sample collection and handling*

110 We previously reported the sample collection and handling procedure in Rothman et al  
111 2021 (17) and Rothman et al 2022 (42). Briefly, we collected 317 1-liter 24-hour composite  
112 influent wastewater samples by autosampler at eight WTPs across Southern California between  
113 April 2020 – August 2021 (Table 1). We aliquoted and stored 50 mL of sample at 4 °C until  
114 processing.

115

116 *Wastewater sample RNA extraction*

117 We used two separate RNA extraction and library preparation protocols for the samples  
118 in this study. For one set (N = 269), we used a protocol based on Crits-Christoph 2021 (25) and  
119 Rothman 2021 (17), and as the samples' RNA was extracted for both this study and Rothman et  
120 al 2022 (42), we refer to that paper for detailed RNA extraction methods. Briefly, samples were  
121 pasteurized at 65 °C for 90 minutes in a water bath, filtered through 0.22-µM sterile filters  
122 (VWR, Radnor, PA), then centrifugated at 3000 xg with 10-kDa filters (MilliporeSigma,  
123 Burlington, MA) and RNA was extracted with an Invitrogen PureLink RNA Mini Kit plus  
124 DNase (Invitrogen, Waltham, MA). We will refer to these samples as “Illumina Respiratory  
125 Virus enriched” (IRV) henceforth.

126 A second set of RNA extractions was carried out (N = 95) with a different extraction and  
127 library preparation protocol based on Rothman 2021 (17) and Steele 2021 (34). Briefly, we  
128 added 25 mM MgCl<sub>2</sub> to 20 mL of wastewater, then acidified the samples to pH < 3.5 with HCl.  
129 We then transferred the mixture to a cellulose ester membrane (type HA; Millipore, Bedford,

130 MA) then bead bashed the filters in preloaded 2 mL ZR BashingBead lysis tubes (Zymo, Irvine,  
131 CA) for 1 minute. Lastly, we extracted total nucleic acids with a NucliSENS extraction kit with  
132 magnetic bead capture following the supplied protocol (bioMérieux, Durham, NC). Libraries for  
133 these samples were then prepared as follows and will be referred to as “tiled amplicons.”

134

#### 135 *Sequencing library preparation*

136 All sample library preparation and sequencing steps were carried out by the University of  
137 California Irvine Genomics High Throughput Facility (GHTF). The GHTF prepared IRV-  
138 enriched libraries with the Illumina Respiratory Virus Oligonucleotide panel paired with an  
139 Illumina RNA prep with enrichment kit (Illumina, San Diego, CA) following the manufacturer’s  
140 protocol. The tiled amplicon libraries were prepared by using the QIAseq SARS-CoV-2 Primer  
141 Panel paired with a QIAseq FX DNA Library UDI kit (Qiagen, Germantown, MD) and using the  
142 manufacturer’s protocol. The GHTF sequenced the resulting paired-end libraries as either 2 x  
143 100 bp or 2 x 150 bp (supplemental file SF1) on an Illumina NovaSeq 6000 with an S4 300  
144 cycling kit and sent the data as demultiplexed FASTQ files.

145

#### 146 *Bioinformatics and sequence data processing*

147 All data processing was conducted on the UCI High Performance Community Computing  
148 Cluster (HPC3). We removed sequencing adapter sequences and low-quality bases with the  
149 BBTools software “bbduk” (43). We subsequently marked sequencing duplicates with Picard  
150 toolkit “MarkDuplicates” (44), removed reads mapping to the HG38 human genome with  
151 Bowtie2 (45), then used Kraken2 (46) and Bracken (47) to taxonomically classify our reads for



152 reporting purposes and plotted those relative abundances as a stacked bar plot with the R  
153 package “ggplot2” (48, 49).

154         Once we had removed the human reads, we aligned the reads to the SARS-CoV-2 Hu-1  
155 reference strain (50) with Bowtie2, then sorted and indexed the resulting bam files with  
156 “samtools” (51). We used iVar (52) with default settings to trim off QIAseq primer sequences  
157 and call single nucleotide variants (SNVs) with a Fisher’s exact test of  $P < 0.05$  for as compared  
158 to the reference strain (supplemental file SF1). Subsequently, we used Freyja (29) to assign  
159 SARS-CoV-2 lineage and sublineage identities to the alignments using the UShER phylogeny  
160 (53) and then de-mix the clades and sublineages within each sample to calculate approximate  
161 relative abundances. As we wanted to compare the results from IRV-enriched libraries to tiled  
162 amplicon libraries, we also used the iVar/Freyja pipeline to call SNVs and assign  
163 lineages/sublineages to these libraries even though there were no true primers to remove.

164         To compare our wastewater sequence data to clinical sequencing, we obtained the date of  
165 sublineage detection and reported genomes from PANGO, GISAID, and the California Health  
166 and Human Services Agency (20, 21, 54, 55) and associated these dates to our wastewater  
167 sampling dates. Due to the longitudinal nature of our data, we compared variant lineage  
168 abundances (as counts per million) over time with MaAsLin2 (56) where we had yearlong data,  
169 using WTP and sequencing batch as random effects. Likewise, we reported SNVs from 68  
170 samples with detectible SARS-CoV-2 in Rothman 2021 (17), but here we reanalyzed the data  
171 and present the new results for consistency with our new methods.

172         We investigated SARS-CoV-2 sublineage alpha diversity through Kruskal-Wallis testing  
173 and beta diversity through Adonis PERMANOVA testing with the R package “vegan” (57) and  
174 measured the change in diversity with linear mixed effects regression models (LMERs) with the

175 R package “lmerTest” (58) using both WTP and sequencing batch as random effects. Lastly, we  
176 plotted all of the data with the R packages “ggplot2,” “ggrepel” (59), “Rcartocolor” (60), and  
177 “Patchwork” (61).

178

#### 179 *Data availability*

180 Representative analyses scripts and code are available at  
181 [https://github.com/jasonarothman/wastewater\\_sarscov2\\_apr20\\_aug21](https://github.com/jasonarothman/wastewater_sarscov2_apr20_aug21), and raw sequencing files  
182 have been deposited at the NCBI Sequence Read Archive under accession number  
183 PRJNA729801. SARS-CoV-2 lineage assignments and SNV calls are available in supplemental  
184 file SF1, the California Health and Human Service Agency COVID-19 Variants Dataset (55),  
185 and GISAID data are available by request from GISAID (<https://gisaid.org/>) (54) per their terms  
186 of use.

187 Results:

188

189 We used two library preparation techniques on our samples (IRV-enriched and tiled  
190 amplicon), so we report the summary statistics separately below. For IRV-enriched samples, we  
191 sequenced 548,883,572 nonhuman quality-filtered paired-end reads (average = 1,020,230, range  
192 = 9,910 – 8,243,363) across 269 samples. We taxonomically classified an average of 58.8% of  
193 reads (range = 8.9 – 85.4%) of which an average of 9.4% of overall reads were viral (range = 0.1  
194 – 53.7%). Of total viruses, 2,281,212 reads (6.0%) mapped to SARS-CoV-2. Regarding tiled-  
195 amplicon samples, we sequenced 1,074,798,497 nonhuman quality-filtered paired-end reads  
196 (average = 11,313,668, range = 8,619,210 – 14,384,197) across 95 samples. We classified an  
197 average of 47.2% of reads (range = 35.9 – 66.7%) of which an average of 4.5% were viral (range  
198 = < 0.01% - 41.6%). Of total tiled-amplicon prepared viruses, 47,427,550 reads (99.6%) mapped  
199 to SARS-CoV-2 (Fig. 1).

200 We obtained broad SARS-CoV-2 genome coverage with both sequencing approaches.  
201 When considering all samples together, IRV-prepared libraries covered 99.92% of the SARS-  
202 CoV-2 genome at a mean sequencing depth of only 2x at each base position. Tiled amplicon  
203 library preparation had both wider coverage and higher sequencing depth, with these libraries  
204 covering 99.95% of the genome at a mean depth of 76 reads per base (Fig. S1).

205 Because SARS-CoV-2 was well-represented in our samples, we could classify reads  
206 mapping to SARS-CoV-2 through UShER SARS-CoV-2 barcoding and de-mixing to  
207 approximate relative abundances with Freyja. We were able to classify many of the mapped  
208 reads to specific named Variants of Interest (VOIs) and Variants of Concern (VOCs) (both  
209 currently circulating and historically significant) along with other sublineages of SARS-CoV-2

210 that do not correspond to a VOI/VOC. Within tiled-amplicon samples that had classifiable reads  
211 (N = 90), these “top 10” most proportionally abundant clades were Alpha ( $\bar{x}$  = 3.3%, range = 0 –  
212 98.8%), Beta ( $\bar{x}$  = 0.23%, range = 0 – 17.2%), Delta ( $\bar{x}$  = 16.0%, range 0 – 100%), Epsilon ( $\bar{x}$  =  
213 4.6%, range = 0 – 98.9%), Gamma ( $\bar{x}$  = 0.02%, range = 0 – 14.3%), Iota ( $\bar{x}$  = 0.02%, range = 0 –  
214 0.7%), Lambda ( $\bar{x}$  = 1.1%, range = 0 – 96.8%), Mu ( $\bar{x}$  = 0.1%, range = 0 – 8.6%), Zeta ( $\bar{x}$  =  
215 0.01%, range = 0 – 0.3%), and all other sublineages combined ( $\bar{x}$  = 67.7%, range = 0 – 99.9%)  
216 (Fig. 2 and Fig. S2). While individual samples contained varying proportions of WHO clades,  
217 only the relative abundance of the Delta variant was shown to increase throughout the course of  
218 the experiment ( $\beta$  = 2.57,  $P_{\text{adj}} < 0.001$ )

219 Within IRV-enriched samples that had classifiable reads (N = 219), the “top 10” most  
220 proportionally abundant SARS-CoV-2 clades were largely similar to tiled-amplicon samples.  
221 These clades were Alpha ( $\bar{x}$  = 0.86%, range = 0 – 100%), Beta ( $\bar{x}$  = 0.50%, range = 0 – 100%),  
222 Delta ( $\bar{x}$  = 15.8%, range = 0 – 100%), Epsilon ( $\bar{x}$  = 17.8%, range = 0 – 100%), Gamma ( $\bar{x}$  =  
223 1.0%, range = 0 – 92.2%), Iota ( $\bar{x}$  = 0.01%, range = 0 – 0.30%), Kappa ( $\bar{x}$  = 0.03%, range = 0 –  
224 2.1%), Lambda ( $\bar{x}$  = 0.02%, range = 0 – 0.4%), Mu ( $\bar{x}$  = 0.02%, range = 0 – 0.7%), Omicron ( $\bar{x}$  =  
225 0.15%, range = 0 – 18.9%), and all other sublineages combined ( $\bar{x}$  = 62.2%, range = 0 – 100%)  
226 (Fig. 2 and Fig. S3). Similar to tiled-amplicon results, only the relative abundance of Delta was  
227 shown to increase throughout the course of the experiment (only samples from ESC, HTP, and  
228 PL WTPs;  $\beta$  = 1.54,  $P_{\text{adj}} = 0.002$ ). As shown above, most of the SARS-CoV-2 reads obtained  
229 from either library preparation method were not part of a named VOI/VOC or were merely  
230 identified as SARS-CoV-2 without a confident lineage classification.

231 In addition to large, overarching SARS-CoV-2 clades (i.e. VOI/VOCs), we often  
232 classified reads to a named PANGO sublineage, and we detected 1,221 unique sublineages at

233 greater than 0.1% proportional abundance, with substantial detection overlap between tiled-  
234 amplicon and IRV sequencing approaches (1,215 and 1,221 named sublineages respectively,  
235 supplemental file SF1). We often detected the presence of SARS-CoV-2 sublineages in  
236 wastewater before clinical sequencing reported detection: Tiled-amplicon sequencing detected  
237 515 (42.7%) in samples before clinical sequencing, in some cases by as much as several months,  
238 and IRV sequencing detected 364 (30%) before clinical reports, again often with substantial  
239 lead-time as above (Fig. 3).

240 We examined the diversity of SARS-CoV-2 subclades at greater than 0.01% relative  
241 abundance where we had long term samples for both IRV-enriched (Escondido, Hyperion, and  
242 Point Loma WTPs, N = 187) and tiled amplicon (Hyperion and Point Loma WTPs, N = 90). The  
243 sublineage alpha diversity of IRV-enriched samples did not differ between WTPs ( $H_{(2)} = 2.1$ ,  $P =$   
244  $0.34$ ) or month ( $H_{(13)} = 18.8$ ,  $P = 0.13$ ), nor did it differ over numerical time ( $t = 0.22$ ,  $P = 0.82$ ).  
245 Beta diversity of the sublineages was not different between WTPs ( $R^2 = 0.01$ ,  $P = 0.07$ ), but  
246 differed between months ( $R^2 = 0.15$ ,  $P < 0.001$ ) and sequencing batches ( $R^2 = 0.03$ ,  $P < 0.001$ )  
247 with no interaction between month and WTP ( $R^2 = 0.10$ ,  $P < 0.12$ ), and did not change over  
248 numerical time ( $t = 0.15$ ,  $P = 0.88$ ) (Fig. 4).

249 We analyzed the tiled-amplicon samples in the same fashion as above, and did not find a  
250 difference in sublineage alpha diversity between WTP ( $H_{(1)} = 0.04$ ,  $P = 0.84$ ) or calendar month  
251 ( $H_{(16)} = 11.2$ ,  $P = 0.80$ ), and diversity remained constant over numerical time ( $t = 0.41$ ,  $P = 0.68$ ).  
252 We observed a difference in beta diversity by month ( $R^2 = 0.21$ ,  $P < 0.001$ ), but not between  
253 WTPs ( $R^2 = 0.01$ ,  $P = 0.58$ ), sequencing batches ( $R^2 = 0.01$ ,  $P = 0.20$ ) or an interaction between  
254 WTP and month ( $R^2 = 0.13$ ,  $P = 0.19$ ), nor by numerical time ( $t = -1.8$ ,  $P = 0.07$ ) (Fig. 4).

255 As we were unable to collect samples from all eight WTPs for the full year, we also  
256 analyzed subclade diversity during months with the broadest WTP coverage (August –  
257 November 2020 without WTP “NC” as there was only one sample,  $N = 61$ ). There was no  
258 difference in sublineage alpha diversity between WTPs ( $H_{(6)} = 11.9$ ,  $P = 0.07$ ), months ( $H_{(3)} =$   
259  $2.5$ ,  $P = 0.47$ ), or numerical time ( $t = -1.4$ ,  $P = 0.17$ ). There was a significant difference in  
260 sublineage beta diversity between WTPs ( $R^2 = 0.15$ ,  $P < 0.001$ ), and an interaction between WTP  
261 and month ( $R^2 = 0.21$ ,  $P < 0.027$ ), with no differences by calendar month ( $R^2 = 0.06$ ,  $P = 0.09$ ) or  
262 sequencing batch ( $R^2 = 0.01$ ,  $P = 0.62$ ), or numerical time ( $t = -0.8$ ,  $P = 0.41$ ).

263 At a more granular level, we also tabulated SARS-CoV-2 Single Nucleotide Variants  
264 (SNVs) throughout our samples (supplemental file SF1). Combined, IRV-enriched and tiled-  
265 amplicon sample preparation methods detected 2,871 SARS-CoV-2 SNVs across the genome,  
266 with each approach capturing a different number of SNVs, and in many cases, different genomic  
267 locations (Fig. 5). IRV-enriched samples contained 1,212 SNVs, most being found only once  
268 (1,071) or twice (83), however we often detected the same SNV multiple times at several  
269 genomic positions in separate samples (Fig. 5). For example, SNVs at nucleotide positions  
270 23403, 241, 14408, 17014, 3037, 28272, 8947, 12878, 2597, 21600, 25563, and 28887 were each  
271 detected over 10 times across the samples. Tiled-amplicon sequencing also detected SNVs well,  
272 identifying 1,808 SNVs across the SARS-CoV-2 genome. Similar to IRV-enriched results, most  
273 SNVs were found once (1,030) or twice (254), although several SNVs were identified in multiple  
274 samples (Fig.5): SNVs located at nucleotide positions 22796, 28971, 22656, 28982, and 9864  
275 were detected over 40 times across tiled-amplicon samples.

276 Discussion:

277

278 Our study represents a large-scale effort to employ wastewater-based epidemiology  
279 (WBE) across a catchment area of 16 million people and supports the monitoring of SARS-CoV-  
280 2 evolution throughout the ongoing COVID-19 pandemic. Through respiratory virus-enriched  
281 and tiled-amplicon RNA sequencing approaches, we classified SARS-CoV-2 lineages and single  
282 nucleotide variants (SNVs) and could approximate VOCs/VOIs across a yearlong study of  
283 Southern California wastewater. Like other studies, we captured SARS-CoV-2 mutations across  
284 the genome and show the potential to detect sublineages and SNVs months before clinical  
285 analyses of patient samples (17, 25, 26, 29, 38). While WBE is a powerful tool - and is not  
286 subject to many of clinical sequencing's drawbacks - we cannot use these methods to determine  
287 the exact source of SARS-CoV-2 variants (17, 25, 29, 37) and instead propose the use of WBE to  
288 monitor populations instead of individuals. Our results suggest that multi-scale sampling of  
289 individual patients, local wastewater catchments (i.e. university campuses), and WTPs can give  
290 public health agencies vital information to identify novel SARS-CoV-2 variants and predict  
291 disease spread to further combat COVID-19 (4, 10, 29).

292 In most samples, we could classify SARS-CoV-2 RNA fragments at multiple levels of  
293 resolution – both at the named variants (i.e. Alpha, Beta, etc) and sublineage levels (i.e. B.1.429,  
294 B.1.617.2, P.1, etc) and calculate semi-quantitative relative abundances. When considering the  
295 full year of data, sublineage diversity of SARS-CoV-2 was not different between WTPs, rather it  
296 changed monthly probably due to the similarity of proportional disease burden and proximity of  
297 San Diego and Los Angeles counties (1). As expected, our sublineage quantification was not  
298 exactly concordant with clinical sequencing data, probably due to the aggregate nature of

299 wastewater and our composite sampling, along with the lack of clinical specimens early in the  
300 pandemic (4, 20, 21, 29, 37). We do note however that ours and clinical data agree well during  
301 the emergence of the Delta variant, suggesting that wastewater can detect the potential  
302 evolutionary replacement of lineages accurately as has been recently shown with the domination  
303 of the Omicron variant (29, 62). Similarly, we detected many SARS-CoV-2 sublineages earlier  
304 in wastewater than clinical sequencing – in some cases by several months – further supporting  
305 work indicating that WBE is useful for predicting disease load and the spread of novel variants  
306 (29, 62). Naturally, we recognize this is a retrospective study, and rely on clinical sequencing to  
307 name and prioritize the variants we sequenced in wastewater, so we suggest that public health  
308 and wastewater sequencing be used in tandem to carefully monitor the evolutionary potential of  
309 SARS-CoV-2 (4).

310         Similar to previous work, we detected thousands of single nucleotide variants (SNVs)  
311 across samples and sequenced putatively novel or rare SNVs that have unknown function or  
312 species host (17, 25, 26, 30, 62, 63). For example, in many samples (from within or between  
313 WTPs), we detected SNVs at positions 9864, 22796, and 28971 which are exceedingly rare in  
314 public sequencing data, along with SNVs at 241, 14408, and 23403 which were common in 2020  
315 (64, 65). Our ability to detect both low-prevalence and near-ubiquitous SNVs indicates that  
316 WBE is broadly useful for accurate SNV detection and may provide a reasonable estimate of  
317 what SNVs are circulating across populations (25, 29, 30, 62, 63). Likewise, when comparing  
318 our results to other wastewater studies, we detected variants or sublineages also reported in Nice,  
319 New York, Montana, Arizona, Northern California, Berlin, and across Austria, often at similar  
320 sampling dates, which shows that sequencing wastewater is reproducible and accurate at very  
321 large scales (25, 30, 38, 66, 67). Being that sequencing wastewater is technically challenging, we



322 qualitatively compared two major methods of SARS-CoV-2 analysis and note that targeted  
323 amplification provided better sequencing depth and resolution, indicating its utility when  
324 presented with degraded low-titer RNA and the detergent/PCR inhibitor content of wastewater  
325 along with our harsh extraction methods (4, 17, 40). We suggest the use of targeted amplification  
326 approaches for wastewater samples, which supports previous work and method development (4,  
327 17, 25, 29, 40, 62, 68, 69).

328 Conclusions:

329 Wastewater-based epidemiology has exploded into a worldwide endeavor and is a critical  
330 part of humanity's response to the COVID-19 pandemic (4, 6, 8, 10). Our study demonstrates  
331 WBE's effectiveness in monitoring SARS-CoV-2 mutations across megaregions (17, 25, 29, 30,  
332 38), which continues to be important as novel VOCs emerge and the popularity of at-home  
333 testing reduces public health's ability to accurately quantify COVID-19 cases (3, 13, 14).  
334 COVID-19 has demonstrated the need for scientists, wastewater agencies, and public health to  
335 work together to track the evolution and spread of SARS-CoV-2, especially in underserved  
336 areas, low population coverage, and places where the medical field is overburdened (4, 15).  
337 WBE has the potential to discover emergent diseases and should be implemented across  
338 population centers as a sentinel for the next pandemic.

339 Acknowledgments:

340 We thank the Los Angeles and Orange County Sanitation Districts, the City of San Diego  
341 Public Utilities, the City of Escondido Hale Avenue Resource Recovery Facility, and the City of  
342 Los Angeles Department of Sanitation and Environment for collecting wastewater samples. We  
343 also thank the developers of Freyja and Adélaïde Roguet for software assistance, and Seung-Ah  
344 Chung for library preparation assistance.

345 This research was supported by the University of California Office of the President  
346 Research Grants Program Office (award numbers R01RG3732 and R00RG2814) awarded to  
347 JAR and KLW, and a Hewitt Foundation for Biomedical Research postdoctoral fellowship to  
348 JAR. This work was made possible, in part, through access to the Genomics High Throughput  
349 Facility Shared Resource of the Cancer Center Support Grant (P30CA-062203) at the University  
350 of California, Irvine, NIH shared instrumentation grants 1S10RR025496-01, 1S10OD010794-01,  
351 and 1S10OD021718-01, and access to computing resources from the UCI High Performance  
352 Community Computing Cluster.

353 Table 1:

354

| Wastewater Treatment Plant                             | Library Preparation Method | Number of Samples | Date Span              | Approximate Inflow (Million Gallons/Day) | Approximate Population Served |
|--------------------------------------------------------|----------------------------|-------------------|------------------------|------------------------------------------|-------------------------------|
| Escondido Hale Avenue Resource Recovery Facility (ESC) | IRV                        | 47                | 7/20/2020 – 7/19/2021  | 14                                       | 190,000                       |
| Hyperion Water Reclamation Plant (HTP)                 | IRV                        | 89                | 8/11/2020 – 7/29/2021  | 275                                      | 4,000,000                     |
|                                                        | Tiled amplicon             | 47                | 4/21/2020 – 7/25/2021  |                                          |                               |
| Joint Water Pollution Control Plant (JWPCP)            | IRV                        | 15                | 8/11/2020 – 11/17/2020 | 400                                      | 4,800,000                     |
| North City Water Reclamation Plant (NC)                | IRV                        | 5                 | 8/14/2020 – 10/23/2020 | 30                                       | 1,400,000                     |
| Orange County Reclamation Plant #1 (OC)                | IRV                        | 14                | 8/12/2020 – 12/21/2020 | 140                                      | 2,600,000                     |
| Point Loma Water Treatment Plant (PL)                  | IRV                        | 77                | 8/13/2020 – 8/3/2021   | 175                                      | 2,200,000                     |
|                                                        | Tiled amplicon             | 48                | 4/30/2020 – 8/18/2021  |                                          |                               |
| San Jose Creek Water Reclamation Plant (SJ)            | IRV                        | 15                | 8/12/2020 – 11/18/2020 | 100                                      | 1,000,000                     |
| South Bay Water Reclamation Plant (SB)                 | IRV                        | 7                 | 8/13/2020 – 11/5/2020  | 15                                       | 107,000                       |

355

356 Table 1: Sample quantities, date spans of collection, and approximate influent flow and served  
 357 population. WTP names include the abbreviations used throughout the study, and “IRV” denotes  
 358 Illumina Respiratory Virus Enrichment library preparation.

359 Figure 1:

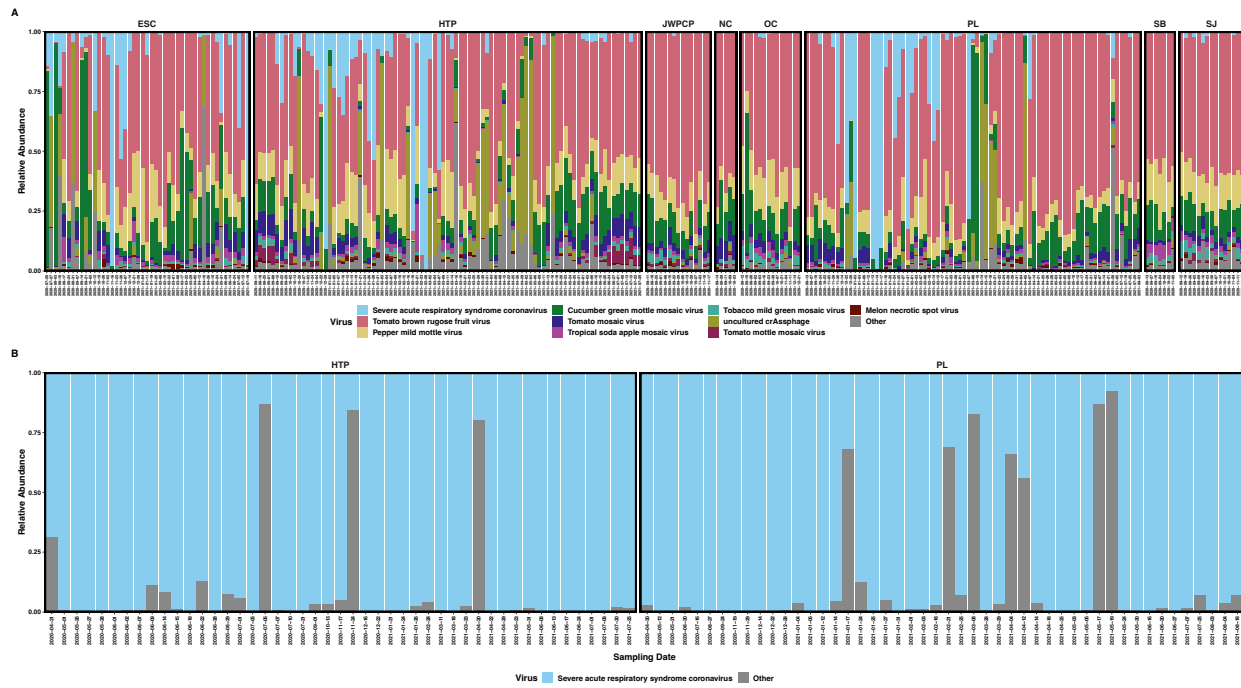

360

361 Figure 1: Stacked bar plots showing the relative abundances of RNA reads mapping to A) the top  
362 10 most proportionally abundant viruses plus all others in respiratory virus-enriched libraries and  
363 B) SARS-CoV-2 plus other viruses in tiled-amplicon libraries. Plots are faceted by WTP and  
364 labeled with sampling date.

365 Figure 2:

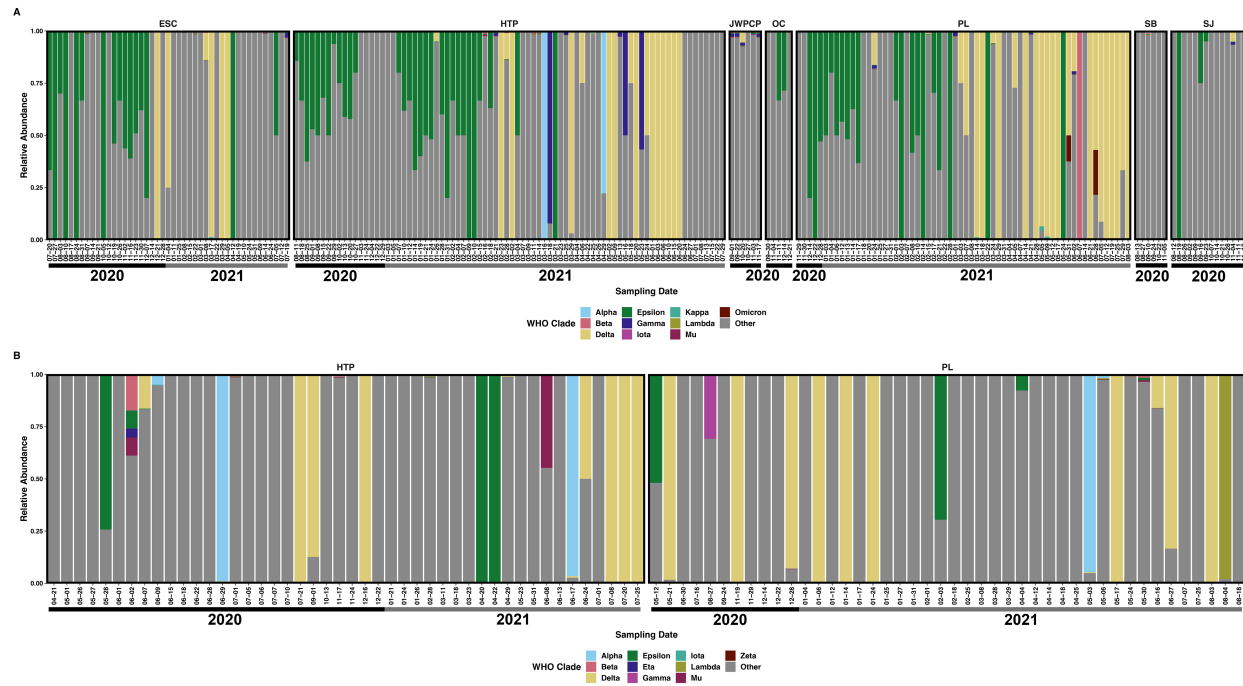

366  
367 Figure 2: The relative proportional abundance of the ten most abundant SARS-CoV-2 lineages  
368 plus others in A) respiratory virus-enriched libraries, B) tiled-amplicon libraries faceted by WTP  
369 and labeled with sampling date. Note that one sample date from the North City Water  
370 Reclamation Plant is not shown.

371 Figure 3:

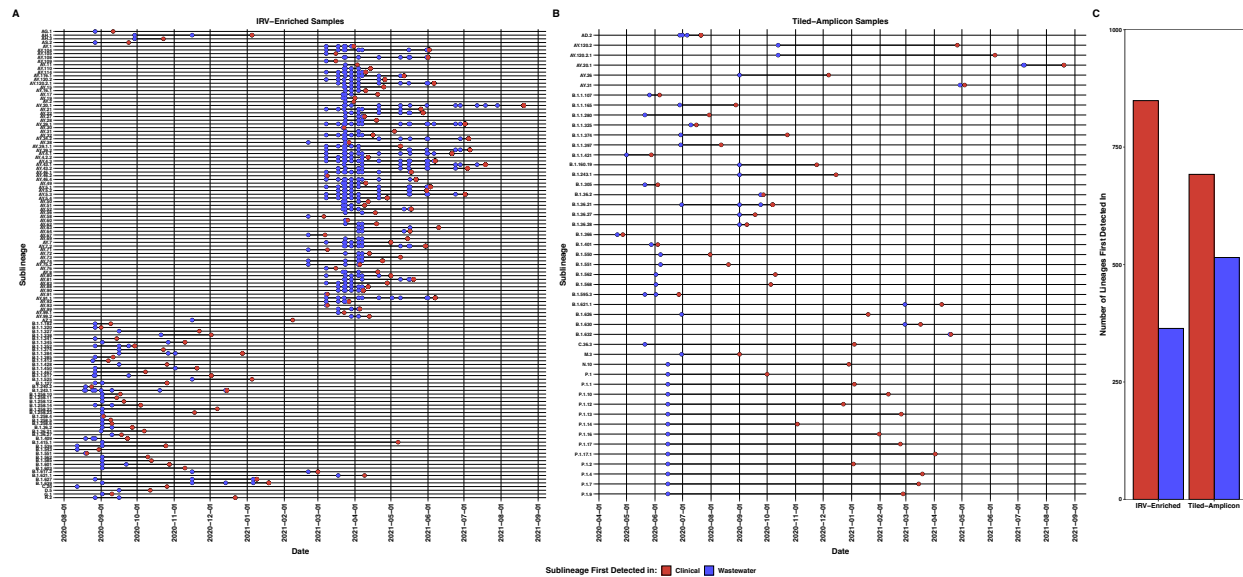

372

373 Figure 3: SARS-CoV-2 sublineages at greater than 0.2% relative abundance (for plot visibility)  
374 first detected in wastewater samples in A) respiratory virus-enriched libraries (IRV) and B) tiled-  
375 amplicon libraries by date. Panel C denotes the total number of SARS-CoV-2 sublineages first  
376 detected by our wastewater sequencing or clinical samples by IRV or tiled-amplicon libraries  
377 respectively without the relative abundance cutoff.

378 Figure 4:

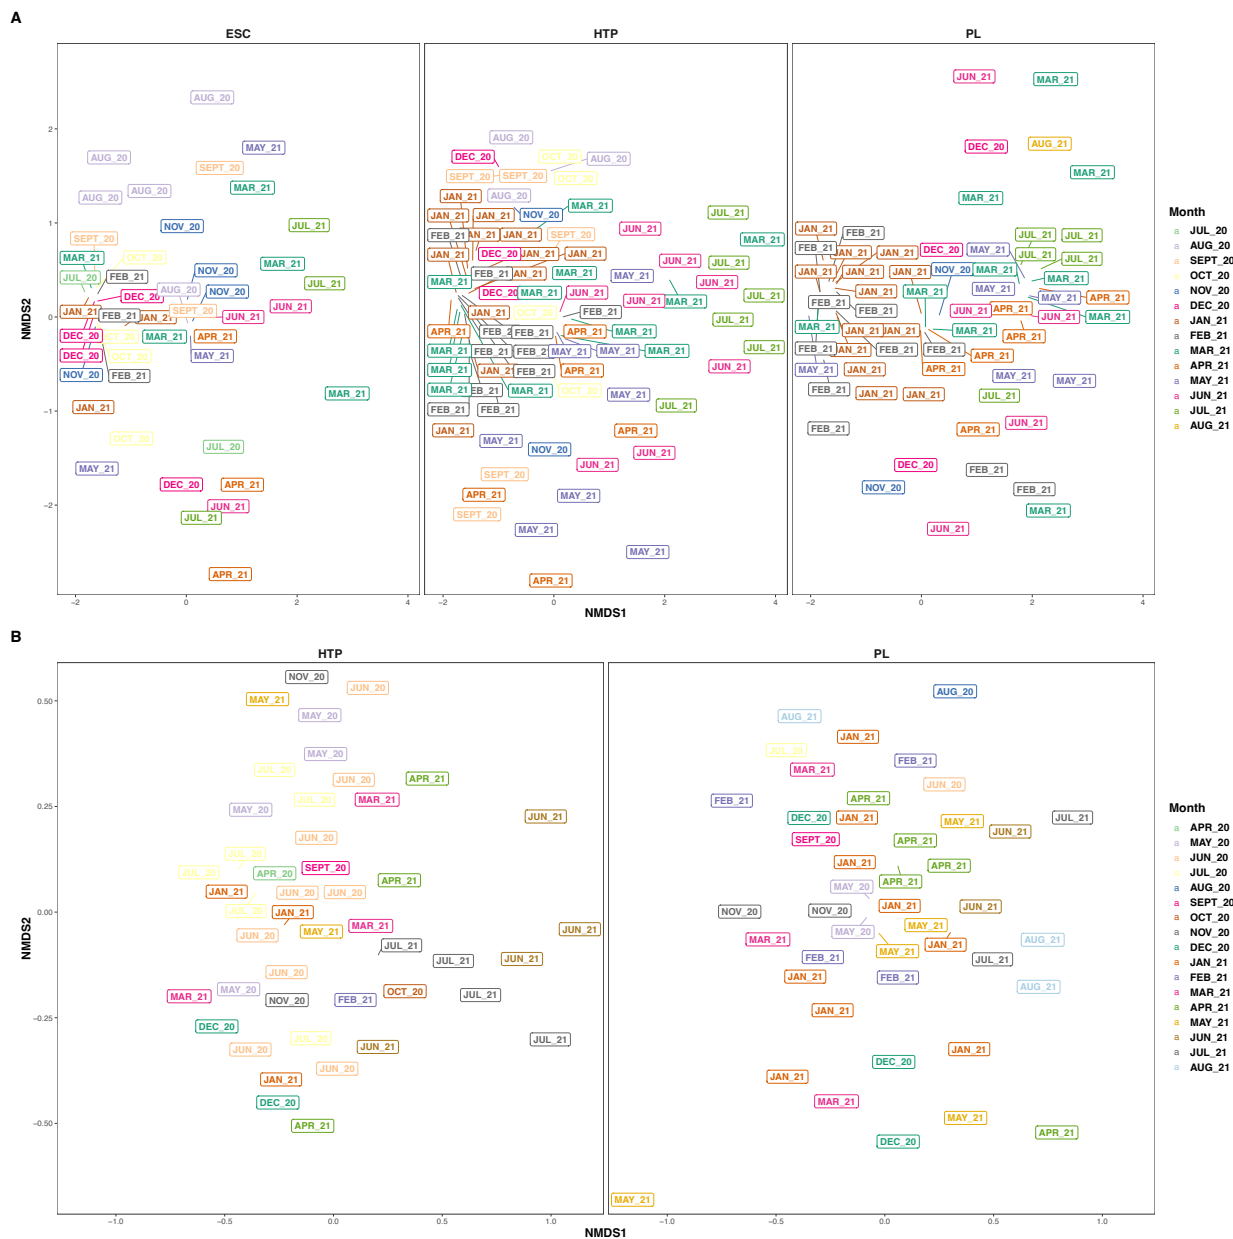

379

380 Figure 4: Non-metric multidimensional scaling (NMDS) ordinations of the Bray-Curtis  
 381 dissimilarities of SARS-CoV-2 sublineages faceted by water treatment plant for A) respiratory  
 382 virus-enriched (IRV) and B) tiled-amplicon libraries. SARS-CoV-2 sublineages did not  
 383 significantly differ between WTPs (PERMANOVA [IRV:  $P = 0.07$ ,  $R^2 = 0.01$ ], [tiled-amplicon:  
 384  $P = 0.58$ ,  $R^2 = 0.01$ ]) but differed by calendar month (PERMANOVA [IRV:  $P < 0.001$ ,  $R^2 =$



385 0.15], [tiled-amplicon:  $P < 0.001$ ,  $R^2 = 0.21$ ]). Color and plot labels denote sampling month, and  
386 only WTPs with yearlong data are included.

387 Figure 5:

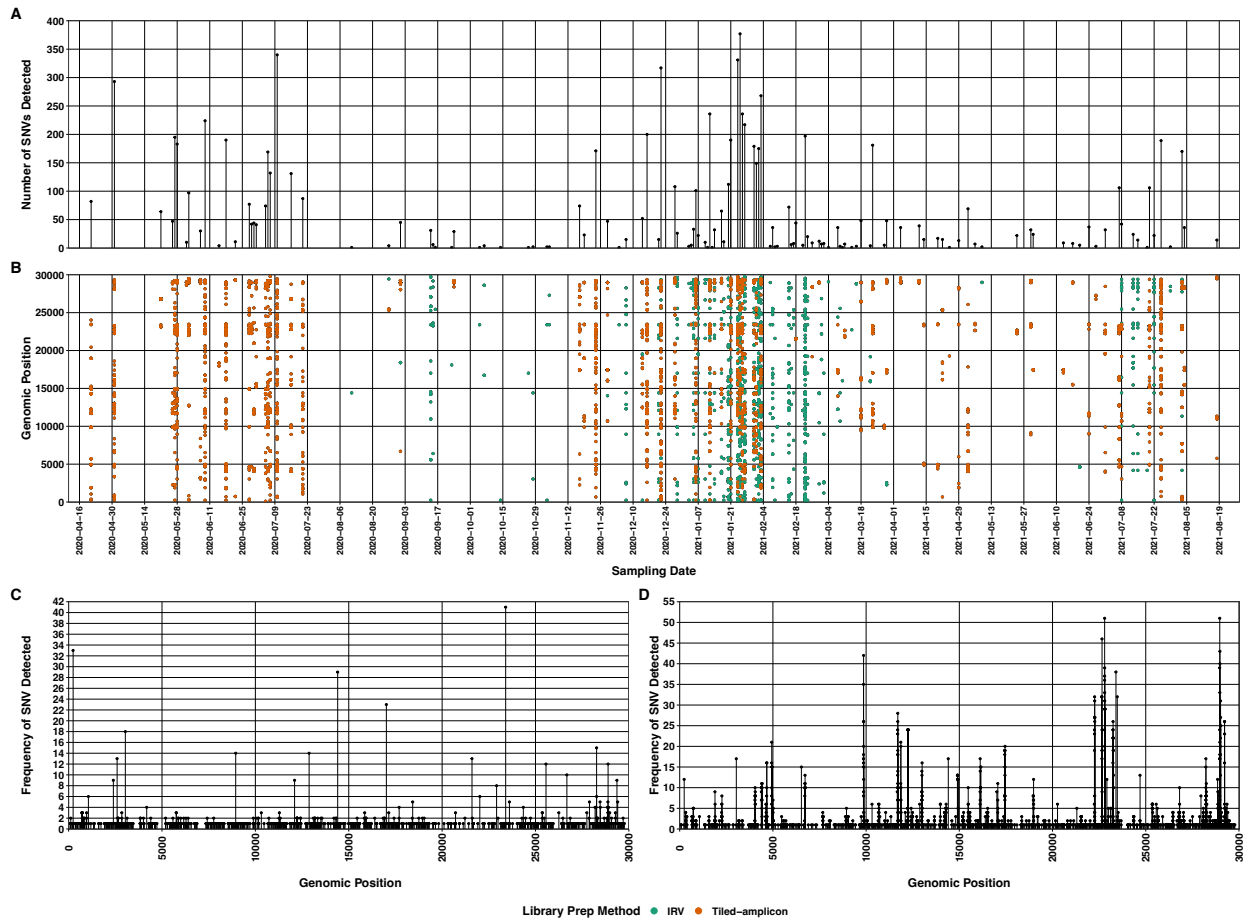

388

389 Figure 5: A) Number of single nucleotide variants (SNVs) detected at each sample date and B)

390 nucleotide position across the SARS-CoV-2 genome for all samples colored by library

391 preparation method (IRV signifies Illumina Respiratory Virus enrichment panel). Panels C and D

392 indicate the frequency of SNVs detected at each position of the SARS-CoV-2 genome across all

393 respiratory virus-enriched and tiled-amplicon libraries respectively.

394 References:

395

396 1. E. Dong, H. Du, L. Gardner, An interactive web-based dashboard to track COVID-19 in  
397 real time. *Lancet Infect. Dis.* **20**, 533–534 (2020).

398 2. J. F.-W. Chan, *et al.*, Genomic characterization of the 2019 novel human-pathogenic  
399 coronavirus isolated from a patient with atypical pneumonia after visiting Wuhan. *Emerg.*  
400 *Microbes Infect.* **9**, 221–236 (2020).

401 3. R. C. Reiner, *et al.*, Modeling COVID-19 scenarios for the United States. *Nat. Med.* **27**, 94–  
402 105 (2021).

403 4. F. Wu, *et al.*, Making waves: Wastewater surveillance of SARS-CoV-2 in an endemic  
404 future. *Water Res.* **219**, 118535 (2022).

405 5. H. Leite, C. Lindsay, M. Kumar, COVID-19 outbreak: implications on healthcare  
406 operations. *The TQM Journal* **39**, 88 (2020).

407 6. N. Sharara, *et al.*, Wastewater network infrastructure in public health: Applications and  
408 learnings from the COVID-19 pandemic. *PLOS Glob Public Health* **1** (2021).

409 7. S. Karthikeyan, *et al.*, High-throughput wastewater SARS-CoV-2 detection enables  
410 forecasting of community infection dynamics in San Diego County. *mSystems* **6** (2021).

411 8. C. C. Naughton, *et al.*, Show us the Data: Global COVID-19 Wastewater Monitoring  
412 Efforts, Equity, and Gaps. *bioRxiv* (2021) <https://doi.org/10.1101/2021.03.14.21253564>.

413 9. J. Peccia, *et al.*, Measurement of SARS-CoV-2 RNA in wastewater tracks community  
414 infection dynamics. *Nat. Biotechnol.* **38**, 1164–1167 (2020).

415 10. A. Bivins, *et al.*, Wastewater-based epidemiology: global collaborative to maximize  
416 contributions in the fight against COVID-19. *Environmental Science and Technology* **54**,  
417 7754–7757 (2020).

418 11. D. Jarrom, *et al.*, Effectiveness of tests to detect the presence of SARS-CoV-2 virus, and  
419 antibodies to SARS-CoV-2, to inform COVID-19 diagnosis: a rapid systematic review.  
420 *BMJ Evid Based Med* **27**, 33–45 (2022).

421 12. X. Lu, *et al.*, US CDC Real-time reverse transcription pcr panel for detection of Severe  
422 Acute Respiratory Syndrome Coronavirus 2. *Emerg. Infect. Dis.* **26** (2020).

423 13. C. Whittaker, *et al.*, Under-reporting of deaths limits our understanding of true burden of  
424 covid-19. *BMJ* **375**, n2239 (2021).

425 14. S. A. Qasmieh, *et al.*, The prevalence of SARS-CoV-2 infection and uptake of COVID-19  
426 antiviral treatments during the BA.2/BA.2.12.1 surge, New York City, April-May 2022.  
427 *bioRxiv* (2022) <https://doi.org/10.1101/2022.05.25.22275603>.

- 428 15. M. B. Reitsma, *et al.*, Racial/ethnic disparities in COVID-19 exposure risk, testing, and  
429 cases at the subcounty level in California. *Health Aff.* **40**, 870–878 (2021).
- 430 16. F. Wu, *et al.*, SARS-CoV-2 RNA concentrations in wastewater foreshadow dynamics and  
431 clinical presentation of new COVID-19 cases. *Sci. Total Environ.* **805**, 150121 (2022).
- 432 17. J. A. Rothman, *et al.*, RNA Viromics of southern california wastewater and detection of  
433 SARS-CoV-2 single-nucleotide variants. *Appl. Environ. Microbiol.* **87**, e0144821 (2021).
- 434 18. K. Tao, *et al.*, The biological and clinical significance of emerging SARS-CoV-2 variants.  
435 *Nat. Rev. Genet.* **22**, 757–773 (2021).
- 436 19. C. L. D. C. Badua, K. A. T. Baldo, P. M. B. Medina, Genomic and proteomic mutation  
437 landscapes of SARS-CoV-2. *J. Med. Virol.* **93**, 1702–1721 (2021).
- 438 20. Á. O’Toole, *et al.*, Assignment of epidemiological lineages in an emerging pandemic using  
439 the pangolin tool. *Virus Evol* **7**, veab064 (2021).
- 440 21. A. Rambaut, *et al.*, A dynamic nomenclature proposal for SARS-CoV-2 lineages to assist  
441 genomic epidemiology. *Nat Microbiol* **5**, 1403–1407 (2020).
- 442 22. World Health Organization, Tracking SARS-CoV-2 variants (2022) (June 1, 2022).
- 443 23. E. Alm, *et al.*, Geographical and temporal distribution of SARS-CoV-2 clades in the WHO  
444 European Region, January to June 2020. *Euro Surveill.* **25** (2020).
- 445 24. C. Jung, *et al.*, Omicron: What Makes the Latest SARS-CoV-2 Variant of Concern So  
446 Concerning? *J. Virol.* **96**, e0207721 (2022).
- 447 25. A. Crits-Christoph, *et al.*, Genome sequencing of sewage detects regionally prevalent  
448 SARS-CoV-2 variants. *MBio* **12** (2021).
- 449 26. R. S. Fontenele, *et al.*, High-throughput sequencing of SARS-CoV-2 in wastewater provides  
450 insights into circulating variants. *Water Res.* **205**, 117710 (2021).
- 451 27. R. Wang, *et al.*, Analysis of SARS-CoV-2 mutations in the United States suggests presence  
452 of four substrains and novel variants. *Commun Biol* **4**, 228 (2021).
- 453 28. E. C. Rouchka, J. H. Chariker, D. Chung, Variant analysis of 1,040 SARS-CoV-2 genomes.  
454 *PLoS One* **15**, e0241535 (2020).
- 455 29. S. Karthikeyan, *et al.*, Wastewater sequencing reveals early cryptic SARS-CoV-2 variant  
456 transmission. *Nature* **609**, 101–108 (2022).
- 457 30. D. S. Smyth, *et al.*, Tracking cryptic SARS-CoV-2 lineages detected in NYC wastewater.  
458 *Nat. Commun.* **13**, 635 (2022).

- 459 31. V. Vo, *et al.*, Use of wastewater surveillance for early detection of Alpha and Epsilon  
460 SARS-CoV-2 variants of concern and estimation of overall COVID-19 infection burden.  
461 *Sci. Total Environ.* **835**, 155410 (2022).
- 462 32. K. M. O'Reilly, D. J. Allen, P. Fine, H. Asghar, The challenges of informative wastewater  
463 sampling for SARS-CoV-2 must be met: lessons from polio eradication. *Lancet Microbe* **1**,  
464 e189–e190 (2020).
- 465 33. M. L. Wilder, *et al.*, Co-quantification of crAssphage increases confidence in wastewater-  
466 based epidemiology for SARS-CoV-2 in low prevalence areas. *Water Res X* **11**, 100100  
467 (2021).
- 468 34. J. A. Steele, A. G. Zimmer-Faust, J. F. Griffith, S. B. Weisberg, Sources of variability in  
469 methods for processing, storing, and concentrating SARS-CoV-2 in influent from urban  
470 wastewater treatment plants. *bioRxiv* (2021) <https://doi.org/10.1101/2021.06.16.21259063>.
- 471 35. R. J. Newton, J. S. McClary, The flux and impact of wastewater infrastructure  
472 microorganisms on human and ecosystem health. *Curr. Opin. Biotechnol.* **57**, 145–150  
473 (2019).
- 474 36. M. Achak, *et al.*, SARS-CoV-2 in hospital wastewater during outbreak of COVID-19: A  
475 review on detection, survival and disinfection technologies. *Sci. Total Environ.* **761**, 143192  
476 (2021).
- 477 37. J. A. Baaijens, *et al.*, Variant abundance estimation for SARS-CoV-2 in wastewater using  
478 RNA-Seq quantification. *medRxiv* (2021) <https://doi.org/10.1101/2021.08.31.21262938>.
- 479 38. F. Amman, *et al.*, National-scale surveillance of emerging SARS-CoV-2 variants in  
480 wastewater. *bioRxiv* (2022) <https://doi.org/10.1101/2022.01.14.21267633>.
- 481 39. A. Bivins, *et al.*, Persistence of SARS-CoV-2 in Water and Wastewater. *Environ. Sci.*  
482 *Technol. Lett.* **7**, 937–942 (2020).
- 483 40. W. Ahmed, *et al.*, Minimizing errors in RT-PCR detection and quantification of SARS-  
484 CoV-2 RNA for wastewater surveillance. *Sci. Total Environ.* **805**, 149877 (2022).
- 485 41. S. E. Philo, *et al.*, A comparison of SARS-CoV-2 wastewater concentration methods for  
486 environmental surveillance. *Sci. Total Environ.* **760**, 144215 (2021).
- 487 42. J. A. Rothman, *et al.*, Longitudinal metatranscriptomic sequencing of Southern California  
488 wastewater representing 16 million people from August 2020-21 reveals widespread  
489 transcription of antibiotic resistance genes. *Water Res.*, 119421 (2022).
- 490 43. B. Bushnell, *BBTools software package* (2014).
- 491 44. , *Picard toolkit* (Broad Institute, 2019).

- 492 45. B. Langmead, S. L. Salzberg, Fast gapped-read alignment with Bowtie 2. *Nat. Methods* **9**,  
493 357–359 (2012).
- 494 46. D. E. Wood, J. Lu, B. Langmead, Improved metagenomic analysis with Kraken 2. *Genome*  
495 *Biol.* **20**, 257 (2019).
- 496 47. J. Lu, F. P. Breitwieser, P. Thielen, S. L. Salzberg, Bracken: Estimating species abundance  
497 in metagenomics data. *PeerJ Computer Science* **2017**, e104 (2017).
- 498 48. R Core Team, *R: A language and environment for statistical computing* (R Foundation for  
499 Statistical Computing, 2021).
- 500 49. H. Wickham, *ggplot2: Elegant graphics for data analysis* (Springer-Verlag New York,  
501 2009).
- 502 50. F. Wu, *et al.*, A new coronavirus associated with human respiratory disease in China.  
503 *Nature* **579**, 265–269 (2020).
- 504 51. H. Li, *et al.*, The Sequence Alignment/Map format and SAMtools. *Bioinformatics* **25**,  
505 2078–2079 (2009).
- 506 52. N. D. Grubaugh, *et al.*, An amplicon-based sequencing framework for accurately measuring  
507 intrahost virus diversity using PrimalSeq and iVar. *Genome Biol.* **20**, 8 (2019).
- 508 53. Y. Turakhia, *et al.*, Ultrafast Sample placement on Existing tRees (USHER) enables real-  
509 time phylogenetics for the SARS-CoV-2 pandemic. *Nat. Genet.* **53**, 809–816 (2021).
- 510 54. S. Elbe, G. Buckland-Merrett, Data, disease and diplomacy: GISAID’s innovative  
511 contribution to global health. *Glob Chall* **1**, 33–46 (2017).
- 512 55. California Health and Human Services Agency, COVID-19 Variant Data - California  
513 Health and Human Services Open Data Portal. *COVID-19 Variant Data - California Health*  
514 *and Human Services Open Data Portal* (2023) (April 10, 2023).
- 515 56. H. Mallick, *et al.*, Multivariable association discovery in population-scale meta-omics  
516 studies. *PLoS Comput. Biol.* **17**, e1009442 (2021).
- 517 57. J. Oksanen, *et al.*, *vegan: Community Ecology Package* (2017).
- 518 58. A. Kuznetsova, P. B. Brockhoff, R. H. B. Christensen, {lmerTest} Package: tests in linear  
519 mixed effects models. *J. Stat. Softw.* **82**, 1–26 (2017).
- 520 59. K. Slowikowski, ggrepel: Automatically position non-overlapping text labels with  
521 “ggplot2.” *R package version 0. 8. 0* (2018).
- 522 60. J. Nowosad, *Rcartocolor: ‘CARTOColors’ palettes* (2018).
- 523 61. T. L. Pedersen, Patchwork: The composer of plots. *R package version 1*, 182 (2020).

- 524 62. V.-F. Schumann, *et al.*, SARS-CoV-2 infection dynamics revealed by wastewater  
525 sequencing analysis and deconvolution. *Sci. Total Environ.* **853**, 158931 (2022).
- 526 63. F. S. Brunner, *et al.*, City-wide wastewater genomic surveillance through the successive  
527 emergence of SARS-CoV-2 Alpha and Delta variants. *Water Res.* **226**, 119306 (2022).
- 528 64. S. Fang, *et al.*, GESS: a database of global evaluation of SARS-CoV-2/hCoV-19 sequences.  
529 *Nucleic Acids Res.* **49**, D706–D714 (2021).
- 530 65. A. T. Chen, K. Altschuler, S. H. Zhan, Y. A. Chan, B. E. Deverman, COVID-19 CG  
531 enables SARS-CoV-2 mutation and lineage tracking by locations and dates of interest. *Elife*  
532 **10** (2021).
- 533 66. G. Rios, *et al.*, Monitoring SARS-CoV-2 variants alterations in Nice neighborhoods by  
534 wastewater nanopore sequencing. *Lancet Reg Health Eur* **10**, 100202 (2021).
- 535 67. A. Nemudryi, *et al.*, Temporal detection and phylogenetic assessment of SARS-CoV-2 in  
536 municipal wastewater. *Cell Rep Med* **1**, 100098 (2020).
- 537 68. F. Wu, *et al.*, SARS-CoV-2 titers in wastewater are higher than expected from clinically  
538 confirmed cases. *mSystems* **5**, e00614-20 (2020).
- 539 69. J. A. Rothman, *et al.*, Metagenomics of Wastewater Influent from Southern California  
540 Wastewater Treatment Facilities in the Era of COVID-19. *Microbiology Resource*  
541 *Announcements* **9**, 19–21 (2020).
